# Supplementary material for: Different Responses to Water Deficit of Two Common Winter Wheat Varieties: Physiological and Biochemical Characteristics
Source: MDPI journal article supplement (doi:10.3390/plants12122239), 2023-06-07
Supplement: s1 [file s1]

Supplementary material

# Different Responses to Water Deficit of Two Common Winter Wheat Varieties: Physiological and Biochemical Characteristics

Antoaneta V. Popova <sup>1, †</sup>, Gergana Mihailova <sup>2, †</sup>, Maria Geneva <sup>2</sup>, Violeta Peeva <sup>2</sup>, Elisaveta Kirova <sup>2</sup>, Mariana Sichanova <sup>2</sup>, Anelia Dobrikova <sup>1, \*</sup>, Katya Georgieva <sup>2</sup>

<sup>1</sup> Institute of Biophysics and Biomedical Engineering, Bulgarian Academy of Sciences, Academic Georgi Bonchev Str., Bl. 21, 1113 Sofia, Bulgaria

<sup>2</sup> Institute of Plant Physiology and Genetics, Bulgarian Academy of Sciences, Acad. Georgi Bonchev Str., Bl. 21, 1113 Sofia, Bulgaria

\* Correspondence: aneli@bio21.bas.bg (A.D.)

† These authors contributed equally to this work.

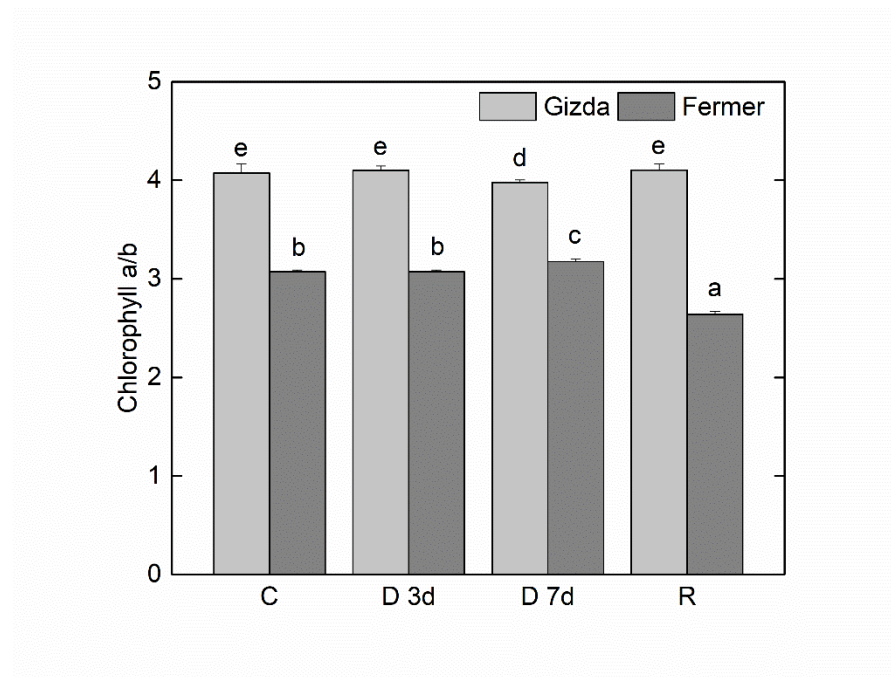

**Figure S1.** Chlorophyll *a/b* ratio in leaves of Gizda and Fermer wheat varieties, subjected to dehydration for 3 (D 3d) and 7 (D 7d) days and after rewatering for 3 days (R). As a control (C) are included values for normally watered plants of the same age. Values are presented as mean  $\pm$  SE ( $n = 4$ ). Significant differences between values are indicated by different letters according to Fisher's LSD test ( $p \leq 0.05$ ) of multifactor ANOVA analysis.

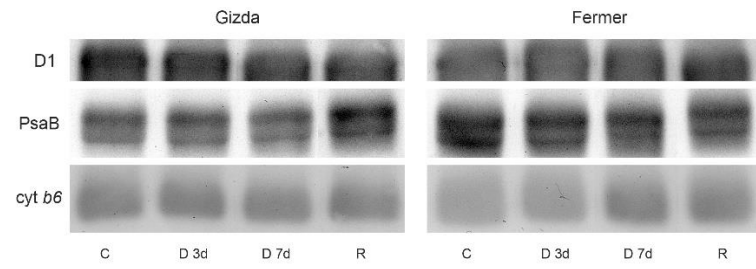

**Figure S2.** Representative Western blots of the main thylakoid-related proteins D1, PsaB and cyt *b6* of wheat varieties Gizda and Fermer in control (C), dehydrated for 3 days (D 3d) or 7 days (D 7d) and rehydrated (R) plants. Thylakoid samples corresponding to 1.5  $\mu$ g Chl were applied per lane.
